# Supplementary material for: Epigenetic assimilation in the aging human brain
Source: PubMed Central journal article supplement (PMC4848814; doi:10.1186/s13059-016-0946-8), 2016-04-28
Supplement: 13059_2016_946_MOESM1_ESM.pdf [file 13059_2016_946_MOESM1_ESM.pdf]

**SI Table S1.** Sample information.

| <b>Description of the AD twin samples</b> |                  |         |                           |                             |
|-------------------------------------------|------------------|---------|---------------------------|-----------------------------|
| Tissue Type                               | Status           | Zygoty  | Age at Onset (mean±SD)    | Age at Collection (mean±SD) |
| Cortex                                    | Earlier Onset AD | 2MZ/2DZ | 65, 72, 59, 61 (64.2±5.7) | 82, 86, 68, 72 (77.0±8.4)   |
|                                           | Later Onset AD   | 2MZ/2DZ | 75, 77, 66, 64 (70.5±6.5) | 81, 84, 70, 66 (75.2±8.6)   |
| Cerebellum                                | Earlier Onset AD | 1MZ/1DZ | 65, 72 (68.5±5.0)         | 82, 86 (84±2.8)             |
|                                           | Later Onset AD   | 1MZ/1DZ | 66, 64 (65±1.4)           | 70, 66 (68±2.8)             |
| Buccal                                    | AD               | 6MZ/7DZ | 77.8±2.1                  | 79.2±1.9                    |
|                                           | Unaffected       | 6MZ/7DZ | N/A                       | 79.8±2.2                    |

| <b>Description of the steady state brain mRNA samples</b> |     |             |               |           |               |
|-----------------------------------------------------------|-----|-------------|---------------|-----------|---------------|
| Tissue Type                                               | N   | Age (years) | Age (mean±SD) | Sex       | PMI (mean±SD) |
| Cortex                                                    | 455 | 0.42-102    | 48.8±25.7     | 145F/310M | 21.1±19.7     |
| Cerebellum                                                | 456 | 0.42-102    | 48.8±25.6     | 144F/312M | 21.2±19.7     |

| <b>Description of the steady state brain methylation samples</b> |     |             |               |                |                |
|------------------------------------------------------------------|-----|-------------|---------------|----------------|----------------|
| Tissue Type                                                      | N   | Age (years) | Age (mean±SD) | Sex            | PMI* (mean±SD) |
| Cortex                                                           | 369 | 0.42-102    | 48.7±25.8     | 43F/90M/236U** | 14.1±5.3       |
| Cerebellum                                                       | 355 | 0.42-102    | 48.4±27.8     | 35F/86M/234U** | 13.9±5.4       |

\*based on available sample information

\*\*U = Unknown; information unavailable
