# Supplementary material for: Epigenetic assimilation in the aging human brain
Source: PubMed Central journal article supplement (PMC4848814; doi:10.1186/s13059-016-0946-8), 2016-04-28

**A** DNA Modification (F-test  $p < 0.05$ )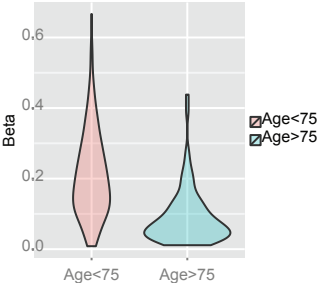**B** DNA Modification (F-test  $p > 0.05$ )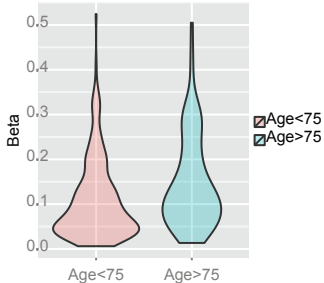**C** Transcriptome (F-test  $p < 0.05$ )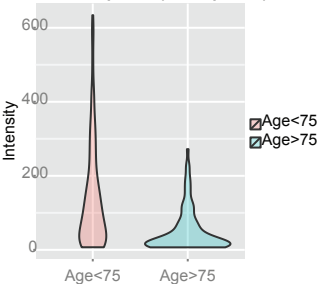**D** Transcriptome (F-test  $p > 0.05$ )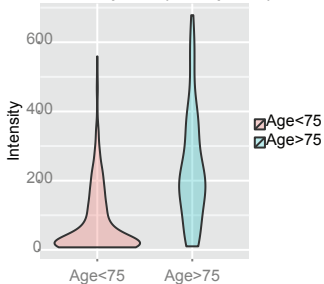

Supplement: 13059_2016_946_MOESM2_ESM.pdf [file 13059_2016_946_MOESM2_ESM.pdf]
