# Supplementary material for: Epigenetic assimilation in the aging human brain
Source: PubMed Central journal article supplement (PMC4848814; doi:10.1186/s13059-016-0946-8), 2016-04-28
Supplement: 13059_2016_946_MOESM3_ESM.pdf [file 13059_2016_946_MOESM3_ESM.pdf]

**SI Table S2.** List of significant loci ( $p < 0.05$ ) in the cerebral cortex of twins different for AD age of onset.

| <b>UHNID</b>    | <b>Genome Location</b>    | <b>Distance (bp)</b> | <b>Gene Symbol</b> | <b>GeneID</b> |
|-----------------|---------------------------|----------------------|--------------------|---------------|
| UHNhscpg0005706 | chr8:8860048-8860910      | 0                    | THEX1              | 90459         |
| UHNhscpg0004893 | chr19:6862929-6863133     | 13637                | SIX3               | 6496          |
| UHNhscpg0005497 | chr4:174254525-174255180  | 0                    | HMGB2              | 3148          |
| UHNhscpg0011218 | chr19:5953724-5953889     | 0                    | RANBP3             | 8498          |
| UHNhscpg0009988 | chr1:215521769-215522004  | 432361               | MGMT               | 4255          |
| UHNhscpg0008760 | chr8:50538115-50538190    | 246752               | FLJ45455           | 388336        |
| UHNhscpg0005663 | chr5:52081719-52081793    | 5002                 | FOXL2              | 668           |
| UHNhscpg0008069 | chr12:102092189-102092425 | 0                    | CHPT1              | 56994         |
| UHNhscpg0008357 | chr1:54355531-54355620    | 420456               | SALL1              | 6299          |
| UHNhscpg0011164 | chr13:80251706-80251844   | 859047               | IKZF2              | 22807         |
| UHNhscpg0010960 | chr3:2140036-2140938      | 0                    | CNTN4              | 152330        |
| UHNhscpg0010408 | chr5:161143932-161144010  | 154                  | OXR1               | 55074         |
| UHNhscpg0010908 | chr1:180736035-180736254  | 0                    | XPR1               | 9213          |
| UHNhscpg0000208 | chr1:11322016-11323073    | 0                    | FRAP1              | 2475          |
| UHNhscpg0005543 | chr11:44332091-44332260   | 15448                | PAX2               | 5076          |
| UHNhscpg0000577 | chr14:37127633-37128348   | 0                    | PAX9               | 5083          |
| UHNhscpg0006170 | chr6:45219715-45219815    | 0                    | SUPT3H             | 8464          |
| UHNhscpg0008762 | chr7:8197140-8197186      | 0                    | ICA1               | 3382          |
| UHNhscpg0000241 | chr11:107461728-107462314 | 0                    | ELMOD1             | 55531         |
| UHNhscpg0005982 | chr6:144042375-144042464  | 0                    | PHACTR2            | 9749          |
| UHNhscpg0001198 | chr5:140729521-140730195  | 0                    | PCDHGA1            | 56114         |

|                 |                           |        |          |        |
|-----------------|---------------------------|--------|----------|--------|
| UHNhscpg0010352 | chr7:22862098-22862545    | 0      | TOMM7    | 54543  |
| UHNhscpg0000478 | chr2:113299334-113299866  | 0      | POLR1B   | 84172  |
| UHNhscpg0011058 | chr20:6103206-6103310     | 0      | C20orf42 | 55612  |
| UHNhscpg0009262 | chr3:185326402-185326618  | 0      | SENP2    | 59343  |
| UHNhscpg0007672 | chr14:51259096-51259859   | 0      | NIN      | 51199  |
| UHNhscpg0000646 | chr15:72978212-72978938   | 0      | HIGD2BP  | 123346 |
| UHNhscpg0002102 | chr6:25698651-25699132    | 0      | SCGN     | 10590  |
| UHNhscpg0008035 | chr3:28768841-28769077    | 86140  | DTNA     | 1837   |
| UHNhscpg0000652 | chr14:34145267-34145696   | 0      | NPAS3    | 64067  |
| UHNhscpg0011782 | chr12:18869657-18869767   | 0      | PLCZ1    | 89869  |
| UHNhscpg0004272 | chr7:157754896-157755094  | 0      | PTPRN2   | 5799   |
| UHNhscpg0009265 | chr11:32605136-32605885   | 0      | EIF3M    | 10480  |
| UHNhscpg0005799 | chr4:93612764-93612815    | 0      | GRID2    | 2895   |
| UHNhscpg0010180 | chr3:32858778-32859102    | 248576 | NR5A2    | 2494   |
| UHNhscpg0002833 | chr11:62445636-62446980   | 0      | LOC51035 | 51035  |
| UHNhscpg0006174 | chr1:16175480-16175629    | 0      | SPEN     | 23013  |
| UHNhscpg0002145 | chr1:116960860-116961486  | 0      | C1orf203 | 84852  |
| UHNhscpg0006151 | chr14:54685966-54686339   | 107843 | GRHL1    | 29841  |
| UHNhscpg0007185 | chr1:212874408-212874637  | 283355 | MGC26647 | 219557 |
| UHNhscpg0010094 | chr10:114542866-114542933 | 0      | VTI1A    | 143187 |
| UHNhscpg0002850 | chr17:75955635-75955946   | 33376  | LRRC8B   | 23507  |
| UHNhscpg0010101 | chr10:22513913-22514088   | 733757 | EPHA3    | 2042   |
| UHNhscpg0008377 | chr5:119750407-           | 347872 | RALYL    | 138046 |

|                 |                          |        |          |        |
|-----------------|--------------------------|--------|----------|--------|
|                 | 119750559                |        |          |        |
| UHNhscpg0005205 | chr20:44518785-44519558  | 0      | NEURL2   | 140825 |
| UHNhscpg0000830 | chr20:11309478-11309784  | 19233  | KIF11    | 3832   |
| UHNhscpg0005280 | chr8:114739195-114739321 | 4004   | PTPN13   | 5783   |
| UHNhscpg0011692 | chr8:39629353-39629436   | 0      | ADAM2    | 2515   |
| UHNhscpg0004273 | chr5:19655452-19655554   | 0      | CDH18    | 1016   |
| UHNhscpg0002088 | chr2:71356722-71358044   | 0      | MCEE     | 84693  |
| UHNhscpg0007665 | chr8:41511572-41511774   | 0      | NKX6-3   | 157848 |
| UHNhscpg0007259 | chr1:211750802-211750993 | 0      | SLC30A1  | 7779   |
| UHNhscpg0004966 | chr2:45164651-45165365   | 102909 | TMEFF2   | 23671  |
| UHNhscpg0009656 | chr9:129400879-129401043 | 0      | LMX1B    | 4010   |
| UHNhscpg0005789 | chr6:155500048-155500099 | 0      | TIAM2    | 26230  |
| UHNhscpg0005980 | chr3:76941173-76941283   | 86892  | CDS1     | 1040   |
| UHNhscpg0008220 | chr4:26858769-26859739   | 395938 | CLINT1   | 9685   |
| UHNhscpg0009919 | chr3:143815424-143815518 | 15656  | SOX2     | 6657   |
| UHNhscpg0011078 | chr16:33956373-33956680  | 70187  | ALCAM    | 214    |
| UHNhscpg0004168 | chr20:7662145-7662336    | 134358 | FOXD1    | 2297   |
| UHNhscpg0001823 | chr9:115983681-115983911 | 0      | FKBP15   | 23307  |
| UHNhscpg0004853 | chr2:223288492-223288996 | 154101 | MDGA2    | 161357 |
| UHNhscpg0001018 | chr20:11309478-11309784  | 77502  | GNG11    | 2791   |
| UHNhscpg0010587 | chr20:32077436-32077771  | 328204 | NAALADL2 | 254827 |
| UHNhscpg0011447 | chr17:28708184-28708307  | 0      | CPD      | 1362   |
| UHNhscpg0010087 | chr1:48190779-48190856   | 292005 | SOX6     | 55553  |

|                 |                               |        |          |        |
|-----------------|-------------------------------|--------|----------|--------|
| UHNhscpg0009864 | chr4:4866664-4866900          | 350595 | ADAMTSL1 | 92949  |
| UHNhscpg0005920 | chr1:6663435-6663620          | 105247 | TMEM100  | 55273  |
| UHNhscpg0009645 | chr2:24148903-<br>24149577    | 0      | ATAD2B   | 54454  |
| UHNhscpg0006093 | chr13:85059344-<br>85059622   | 203891 | CFTR     | 1080   |
| UHNhscpg0007153 | chr16:47409483-<br>47409531   | 0      | ITFG1    | 81533  |
| UHNhscpg0007521 | chr18:47721421-<br>47721819   | 0      | MYO5B    | 4645   |
| UHNhscpg0006473 | chr9:4666184-4666739          | 0      | C9orf68  | 55064  |
| UHNhscpg0003372 | chr13:97683225-<br>97683322   | 58330  | CXorf55  | 139804 |
| UHNhscpg0010611 | chr3:89377682-<br>89377720    | 0      | EPHA3    | 2042   |
| UHNhscpg0005865 | chr2:111878955-<br>111879262  | 0      | BCL2L11  | 10018  |
| UHNhscpg0003952 | chr7:5462215-5462374          | 0      | KIAA1856 | 84629  |
| UHNhscpg0007838 | chr11:130488782-<br>130489011 | 92077  | HPYR1    | 93668  |
| UHNhscpg0010801 | chr4:109975432-<br>109975499  | 0      | COL25A1  | 84570  |
| UHNhscpg0006064 | chr5:110406357-<br>110406632  | 0      | TSLP     | 85480  |
| UHNhscpg0010564 | chr17:62223312-<br>62223461   | 0      | SNORD104 | 692227 |
| UHNhscpg0010780 | chr11:13434984-<br>13435091   | 0      | BTBD10   | 84280  |
