# Supplementary material for: Epigenetic assimilation in the aging human brain
Source: PubMed Central journal article supplement (PMC4848814; doi:10.1186/s13059-016-0946-8), 2016-04-28

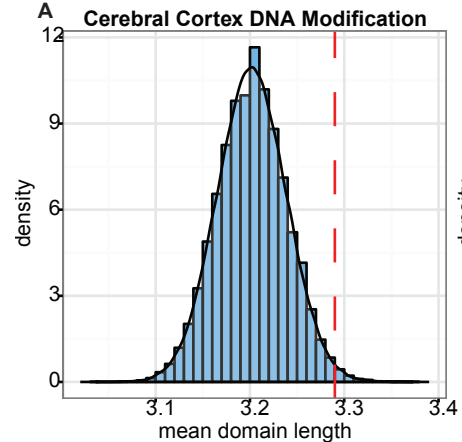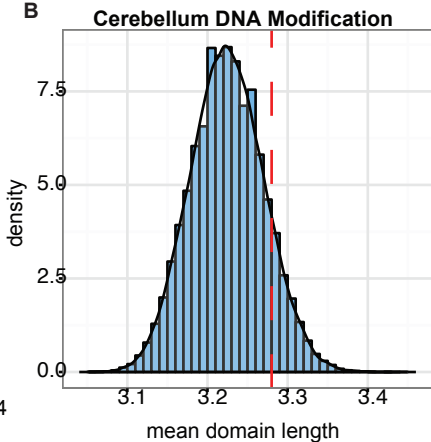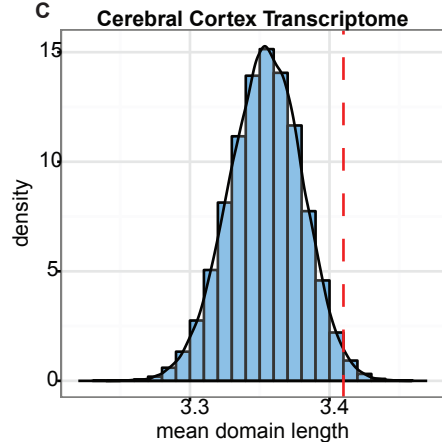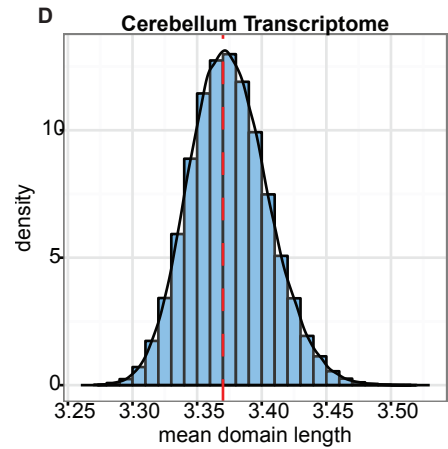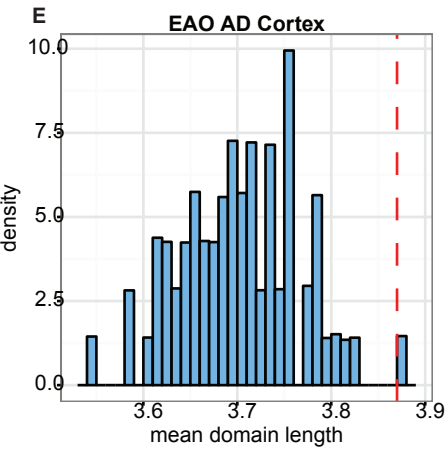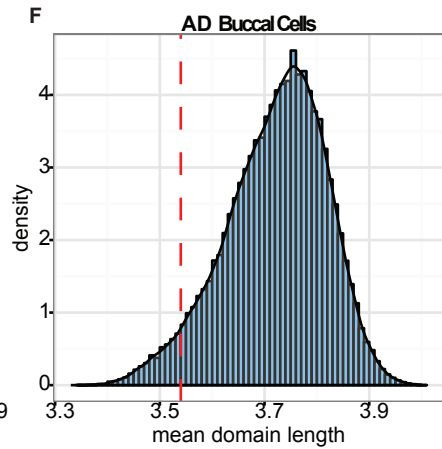

Supplement: 13059_2016_946_MOESM7_ESM.pdf [file 13059_2016_946_MOESM7_ESM.pdf]
