# Supplementary material for: Epigenetic assimilation in the aging human brain
Source: PubMed Central journal article supplement (PMC4848814; doi:10.1186/s13059-016-0946-8), 2016-04-28
Supplement: 13059_2016_946_MOESM8_ESM.pdf [file 13059_2016_946_MOESM8_ESM.pdf]

**SI Table S4.** Raw correlation matrix of DNA modification and transcriptome data for young, middle aged, and old individuals used for Figure 4.

**Correlation matrix for the methylome domain plot (Figure 4A)**

|           |        |        |        |        |        |        |        |        |        |        |        |        |
|-----------|--------|--------|--------|--------|--------|--------|--------|--------|--------|--------|--------|--------|
| <b>11</b> | 0.117  | 0.175  | -0.228 | -0.254 | -0.231 | -0.176 | 0.028  | 0.083  | 0.204  | 0.065  | 1.000  | young  |
|           | -0.092 | 0.432  | -0.364 | -0.426 | -0.236 | -0.040 | -0.065 | -0.183 | 0.020  | 0.072  | 1.000  | middle |
|           | 0.023  | 0.233  | -0.169 | -0.254 | -0.090 | 0.173  | 0.149  | -0.196 | 0.085  | -0.030 | 1.000  | old    |
| <b>10</b> | -0.090 | 0.086  | 0.008  | 0.017  | 0.042  | -0.001 | -0.271 | 0.138  | 0.522  | 1.000  | 0.065  |        |
|           | 0.169  | 0.250  | -0.167 | -0.324 | -0.264 | -0.116 | -0.069 | -0.053 | 0.653  | 1.000  | 0.072  |        |
|           | 0.119  | 0.292  | -0.072 | -0.476 | -0.248 | -0.360 | -0.439 | -0.348 | 0.564  | 1.000  | -0.030 |        |
| <b>9</b>  | -0.044 | 0.155  | -0.137 | 0.012  | -0.046 | -0.020 | -0.115 | 0.637  | 1.000  | 0.522  | 0.204  |        |
|           | -0.119 | 0.474  | -0.215 | -0.195 | -0.148 | -0.120 | -0.049 | -0.186 | 1.000  | 0.653  | 0.020  |        |
|           | 0.030  | 0.416  | 0.000  | -0.208 | -0.238 | -0.145 | -0.247 | -0.331 | 1.000  | 0.564  | 0.085  |        |
| <b>8</b>  | -0.236 | -0.206 | 0.080  | 0.307  | 0.173  | 0.009  | 0.022  | 1.000  | 0.637  | 0.138  | 0.083  |        |
|           | 0.211  | -0.297 | 0.149  | 0.190  | -0.017 | 0.115  | 0.112  | 1.000  | -0.186 | -0.053 | -0.183 |        |
|           | -0.074 | -0.285 | 0.008  | 0.325  | 0.137  | 0.176  | 0.239  | 1.000  | -0.331 | -0.348 | -0.196 |        |
| <b>7</b>  | 0.021  | -0.179 | 0.114  | 0.056  | -0.025 | 0.239  | 1.000  | 0.022  | -0.115 | -0.271 | 0.028  |        |
|           | 0.131  | -0.291 | 0.366  | 0.226  | 0.009  | 0.163  | 1.000  | 0.112  | -0.049 | -0.069 | -0.065 |        |
|           | 0.044  | -0.295 | -0.072 | 0.243  | 0.343  | 0.411  | 1.000  | 0.239  | -0.247 | -0.439 | 0.149  |        |
| <b>6</b>  | 0.096  | -0.399 | 0.194  | 0.096  | 0.173  | 1.000  | 0.239  | 0.009  | -0.020 | -0.001 | -0.176 |        |
|           | 0.152  | -0.491 | 0.308  | 0.266  | 0.397  | 1.000  | 0.163  | 0.115  | -0.120 | -0.116 | -0.040 |        |
|           | -0.044 | -0.386 | 0.146  | 0.275  | 0.365  | 1.000  | 0.411  | 0.176  | -0.145 | -0.360 | 0.173  |        |
| <b>5</b>  | -0.386 | -0.408 | 0.398  | 0.699  | 1.000  | 0.173  | -0.025 | 0.173  | -0.046 | 0.042  | -0.231 |        |
|           | -0.213 | -0.363 | 0.311  | 0.432  | 1.000  | 0.397  | 0.009  | -0.017 | -0.148 | -0.264 | -0.236 |        |
|           | -0.072 | -0.350 | 0.129  | 0.518  | 1.000  | 0.365  | 0.343  | 0.137  | -0.238 | -0.248 | -0.090 |        |
| <b>4</b>  | -0.488 | -0.353 | 0.416  | 1.000  | 0.699  | 0.096  | 0.056  | 0.307  | 0.012  | 0.017  | -0.254 |        |
|           | -0.122 | -0.472 | 0.546  | 1.000  | 0.432  | 0.266  | 0.226  | 0.190  | -0.195 | -0.324 | -0.426 |        |
|           | -0.339 | -0.113 | 0.141  | 1.000  | 0.518  | 0.275  | 0.243  | 0.325  | -0.208 | -0.476 | -0.254 |        |
| <b>3</b>  | -0.264 | -0.377 | 1.000  | 0.416  | 0.398  | 0.194  | 0.114  | 0.080  | -0.137 | 0.008  | -0.228 |        |
|           | -0.029 | -0.526 | 1.000  | 0.546  | 0.311  | 0.308  | 0.366  | 0.149  | -0.215 | -0.167 | -0.364 |        |
|           | -0.184 | -0.164 | 1.000  | 0.141  | 0.129  | 0.146  | -0.072 | 0.008  | 0.000  | -0.072 | -0.169 |        |

|          |          |          |          |          |          |          |          |          |          |           |           |
|----------|----------|----------|----------|----------|----------|----------|----------|----------|----------|-----------|-----------|
|          | 0.044    | 1.000    | -0.377   | -0.353   | -0.408   | -0.399   | -0.179   | -0.206   | 0.155    | 0.086     | 0.175     |
| <b>2</b> | -0.233   | 1.000    | -0.526   | -0.472   | -0.363   | -0.491   | -0.291   | -0.297   | 0.474    | 0.250     | 0.432     |
|          | -0.145   | 1.000    | -0.164   | -0.113   | -0.350   | -0.386   | -0.295   | -0.285   | 0.416    | 0.292     | 0.233     |
| <b>1</b> | 1.000    | 0.044    | -0.264   | -0.488   | -0.386   | 0.096    | 0.021    | -0.236   | -0.044   | -0.090    | 0.117     |
|          | 1.000    | -0.233   | -0.029   | -0.122   | -0.213   | 0.152    | 0.131    | 0.211    | -0.119   | 0.169     | -0.092    |
|          | 1.000    | -0.145   | -0.184   | -0.339   | -0.072   | -0.044   | 0.044    | -0.074   | 0.030    | 0.119     | 0.023     |
|          | <b>1</b> | <b>2</b> | <b>3</b> | <b>4</b> | <b>5</b> | <b>6</b> | <b>7</b> | <b>8</b> | <b>9</b> | <b>10</b> | <b>11</b> |

**Correlation matrix for the transcriptome domain plot (Figure 4B)**

|           |        |        |        |        |        |        |        |        |        |        |        |        |
|-----------|--------|--------|--------|--------|--------|--------|--------|--------|--------|--------|--------|--------|
| <b>11</b> | 0.082  | -0.254 | -0.325 | -0.244 | 0.583  | 0.250  | 0.581  | -0.100 | -0.298 | 0.052  | 1.000  | young  |
|           | -0.132 | -0.316 | -0.525 | -0.192 | 0.510  | -0.019 | 0.534  | 0.011  | -0.202 | 0.319  | 1.000  | middle |
|           | -0.265 | -0.204 | -0.224 | -0.014 | 0.636  | 0.206  | 0.695  | 0.249  | -0.409 | 0.458  | 1.000  | old    |
| <b>10</b> | -0.063 | 0.051  | -0.056 | -0.037 | -0.012 | -0.036 | -0.034 | 0.839  | 0.767  | 1.000  | 0.052  |        |
|           | -0.022 | 0.035  | -0.160 | 0.054  | 0.325  | -0.022 | 0.174  | 0.168  | 0.174  | 1.000  | 0.319  |        |
|           | -0.194 | 0.015  | -0.177 | 0.051  | 0.410  | 0.383  | 0.282  | 0.322  | 0.117  | 1.000  | 0.458  |        |
| <b>9</b>  | 0.015  | 0.327  | 0.099  | 0.102  | -0.406 | -0.005 | -0.355 | 0.852  | 1.000  | 0.767  | -0.298 |        |
|           | -0.104 | 0.073  | 0.266  | 0.116  | -0.519 | 0.056  | -0.411 | 0.352  | 1.000  | 0.174  | -0.202 |        |
|           | 0.288  | 0.234  | -0.234 | -0.183 | -0.504 | -0.151 | -0.532 | 0.263  | 1.000  | 0.117  | -0.409 |        |
| <b>8</b>  | -0.069 | 0.124  | 0.116  | 0.015  | -0.185 | -0.051 | -0.149 | 1.000  | 0.852  | 0.839  | -0.100 |        |
|           | 0.061  | 0.106  | 0.199  | 0.009  | -0.095 | -0.078 | -0.256 | 1.000  | 0.352  | 0.168  | 0.011  |        |
|           | -0.260 | -0.172 | -0.113 | -0.062 | 0.147  | 0.177  | 0.033  | 1.000  | 0.263  | 0.322  | 0.249  |        |
| <b>7</b>  | 0.072  | -0.457 | -0.429 | -0.440 | 0.614  | 0.505  | 1.000  | -0.149 | -0.355 | -0.034 | 0.581  |        |
|           | -0.209 | -0.283 | -0.613 | -0.150 | 0.648  | 0.194  | 1.000  | -0.256 | -0.411 | 0.174  | 0.534  |        |
|           | -0.312 | -0.300 | -0.222 | -0.013 | 0.692  | 0.303  | 1.000  | 0.033  | -0.532 | 0.282  | 0.695  |        |
| <b>6</b>  | 0.179  | 0.204  | 0.136  | -0.107 | 0.372  | 1.000  | 0.505  | -0.051 | -0.005 | -0.036 | 0.250  |        |
|           | 0.047  | 0.306  | 0.185  | 0.001  | 0.152  | 1.000  | 0.194  | -0.078 | 0.056  | -0.022 | -0.019 |        |
|           | -0.153 | 0.123  | 0.216  | 0.263  | 0.500  | 1.000  | 0.303  | 0.177  | -0.151 | 0.383  | 0.206  |        |
| <b>5</b>  | 0.092  | 0.009  | -0.147 | 0.065  | 1.000  | 0.372  | 0.614  | -0.185 | -0.406 | -0.012 | 0.583  |        |
|           | 0.033  | 0.120  | -0.348 | 0.159  | 1.000  | 0.152  | 0.648  | -0.095 | -0.519 | 0.325  | 0.510  |        |
|           | -0.289 | 0.112  | 0.098  | 0.346  | 1.000  | 0.500  | 0.692  | 0.147  | -0.504 | 0.410  | 0.636  |        |

|          |          |          |          |          |          |          |          |          |          |           |           |
|----------|----------|----------|----------|----------|----------|----------|----------|----------|----------|-----------|-----------|
| <b>4</b> | -0.037   | 0.710    | 0.454    | 1.000    | 0.065    | -0.107   | -0.440   | 0.015    | 0.102    | -0.037    | -0.244    |
|          | 0.017    | 0.572    | 0.257    | 1.000    | 0.159    | 0.001    | -0.150   | 0.009    | 0.116    | 0.054     | -0.192    |
|          | -0.139   | 0.600    | 0.392    | 1.000    | 0.346    | 0.263    | -0.013   | -0.062   | -0.183   | 0.051     | -0.014    |
| <b>3</b> | -0.037   | 0.555    | 1.000    | 0.454    | -0.147   | 0.136    | -0.429   | 0.116    | 0.099    | -0.056    | -0.325    |
|          | 0.261    | 0.493    | 1.000    | 0.257    | -0.348   | 0.185    | -0.613   | 0.199    | 0.266    | -0.160    | -0.525    |
|          | 0.101    | 0.392    | 1.000    | 0.392    | 0.098    | 0.216    | -0.222   | -0.113   | -0.234   | -0.177    | -0.224    |
| <b>2</b> | 0.046    | 1.000    | 0.555    | 0.710    | 0.009    | 0.204    | -0.457   | 0.124    | 0.327    | 0.051     | -0.254    |
|          | 0.439    | 1.000    | 0.493    | 0.572    | 0.120    | 0.306    | -0.283   | 0.106    | 0.073    | 0.035     | -0.316    |
|          | 0.428    | 1.000    | 0.392    | 0.600    | 0.112    | 0.123    | -0.300   | -0.172   | 0.234    | 0.015     | -0.204    |
| <b>1</b> | 1.000    | 0.046    | -0.037   | -0.037   | 0.092    | 0.179    | 0.072    | -0.069   | 0.015    | -0.063    | 0.082     |
|          | 1.000    | 0.439    | 0.261    | 0.017    | 0.033    | 0.047    | -0.209   | 0.061    | -0.104   | -0.022    | -0.132    |
|          | 1.000    | 0.428    | 0.101    | -0.139   | -0.289   | -0.153   | -0.312   | -0.260   | 0.288    | -0.194    | -0.265    |
|          | <b>1</b> | <b>2</b> | <b>3</b> | <b>4</b> | <b>5</b> | <b>6</b> | <b>7</b> | <b>8</b> | <b>9</b> | <b>10</b> | <b>11</b> |
